# Supplementary material
Source: PubMed Central journal article supplement (PMC10482167)
Supplement: NIHMS1922384-supplement-ci-2022-00222z_SI_1.pdf [file NIHMS1922384-supplement-ci-2022-00222z_SI_1.pdf]

# **Support Information. A Graph Convolutional Network-based screening strategy for rapid identification of SARS-CoV-2 cell-entry inhibitors**

Peng Gao,<sup>†</sup>Miao Xu,<sup>†</sup>Qi Zhang,<sup>‡,†</sup>Catherine Z Chen,<sup>†</sup>Hui Guo,<sup>†</sup>Yihong Ye,<sup>\*,‡</sup>Wei  
Zheng,<sup>\*,†</sup>and Min Shen<sup>\*,†</sup>

*<sup>†</sup>The National Center for Advancing Translational Sciences (NCATS), National Institutes  
of Health (NIH), MD 20850, USA*

*<sup>‡</sup>National Institute of Diabetes and Digestive and Kidney Diseases (NIDDK), National  
Institutes of Health (NIH), MD 20850, USA*

E-mail: yihongy@niddk.nih.gov; zhengwei@mail.nih.gov; shenmin@mail.nih.gov

## Structural elucidation of the newly identified compounds

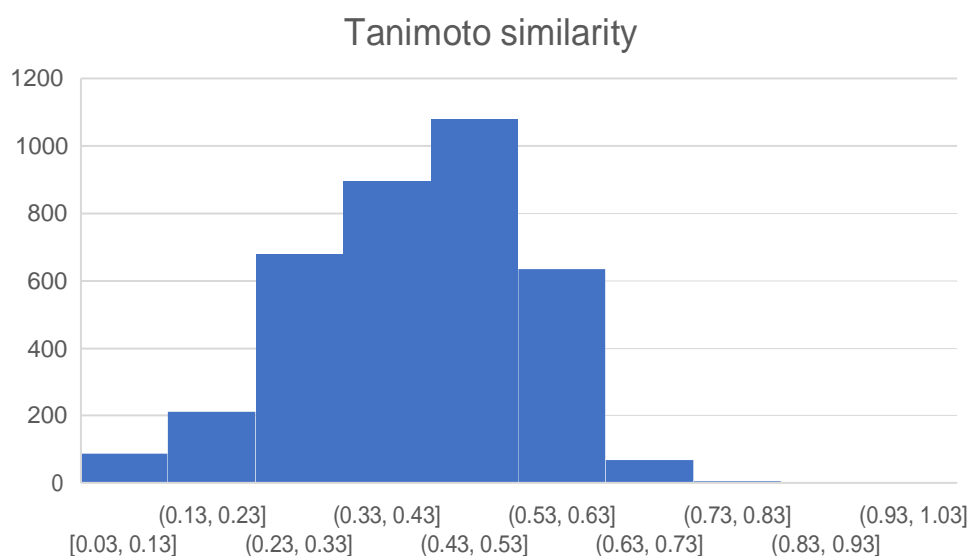

**Figure S. 1.** Tanimoto similarity analysis of the 367 experimentally identified compounds showing activity within endocytosis assay; the type of the applied fingerprint is Extended Connectivity Fingerprint (ECFP).

**Table S. 1.** The confusion matrix of the prediction results of validation data set by GCN (SchNet<sup>1</sup>) architecture.

|                        | Active <sup>a)</sup> | Inactive <sup>a)</sup> |
|------------------------|----------------------|------------------------|
| Active <sup>b)</sup>   | 28                   | 17                     |
| Inactive <sup>b)</sup> | 11                   | 313                    |

<sup>a)</sup> Actual active & inactive labels; <sup>b)</sup> Predicted active & inactive labels.

**Table S. 2.** Tanimoto similarity of the 10 newly identified compounds with the 367 previously confirmed compounds; the type of the applied fingerprint is Extended Connectivity Fingerprint (ECFP).

|    | Compound        | Tanimoto similarity |
|----|-----------------|---------------------|
| 1  | NCGC00115755-02 | 0.37                |
| 2  | NCGC00119962-01 | 0.34                |
| 3  | NCGC00159478-04 | 0.33                |
| 4  | NCGC00411138-01 | 0.38                |
| 5  | NCGC00411588-01 | 0.38                |
| 6  | NCGC00411611-01 | 0.38                |
| 7  | NCGC00411705-01 | 0.37                |
| 8  | NCGC00411718-01 | 0.38                |
| 9  | NCGC00411727-01 | 0.38                |
| 10 | NCGC00411733-01 | 0.38                |

## References

- (1) Schütt, K. T.; Sauceda, H. E.; Kindermans, P.-J.; Tkatchenko, A.; Müller, K.-R. SchNet – A deep learning architecture for molecules and materials. *The Journal of Chemical Physics* **2018**, *148*, 241722.
